# Supplementary material for: Electrochemical composite deposition of porous cactus-like manganese oxide/reduced graphene oxide–carbon nanotube hybrids for high-power asymmetric supercapacitors
Source: Royal Society of Chemistry journal article supplement (doi:10.1039/c5tc00157a), 2015-01-01
Supplement: c5tc00157a1.pdf [file c5tc00157a1.pdf]

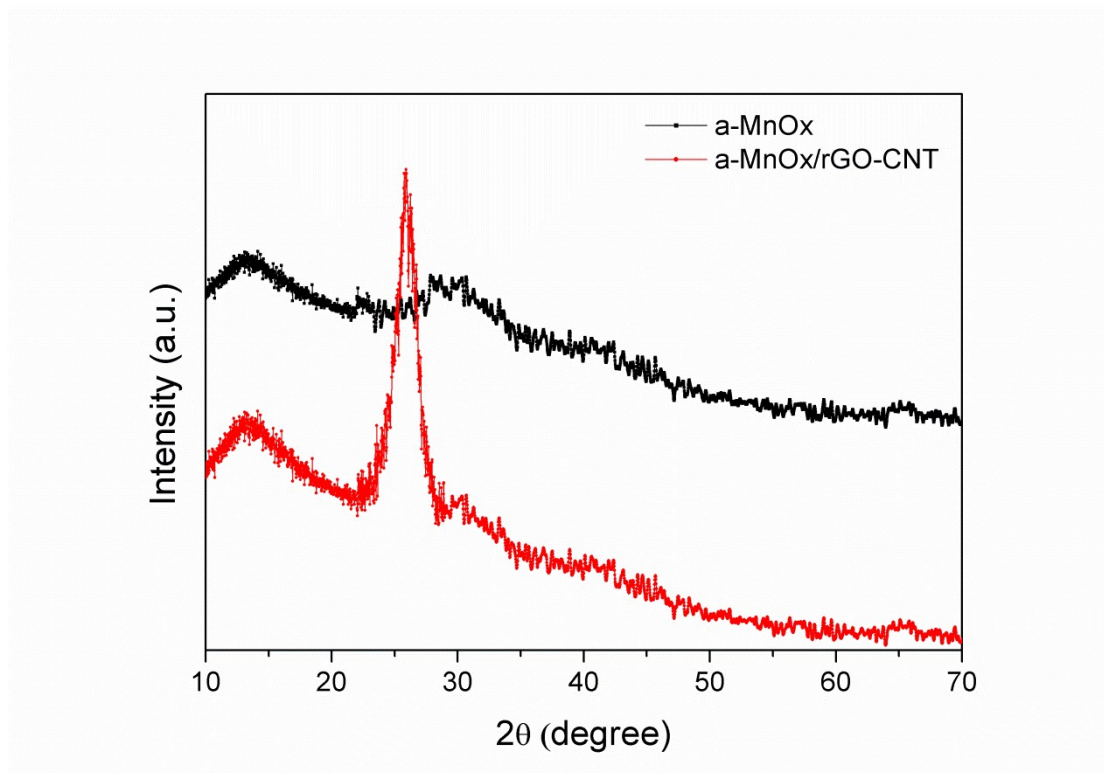

Figure S1. The XRD pattern of a-MnO<sub>2</sub>/rGO-CNT and a-MnOx

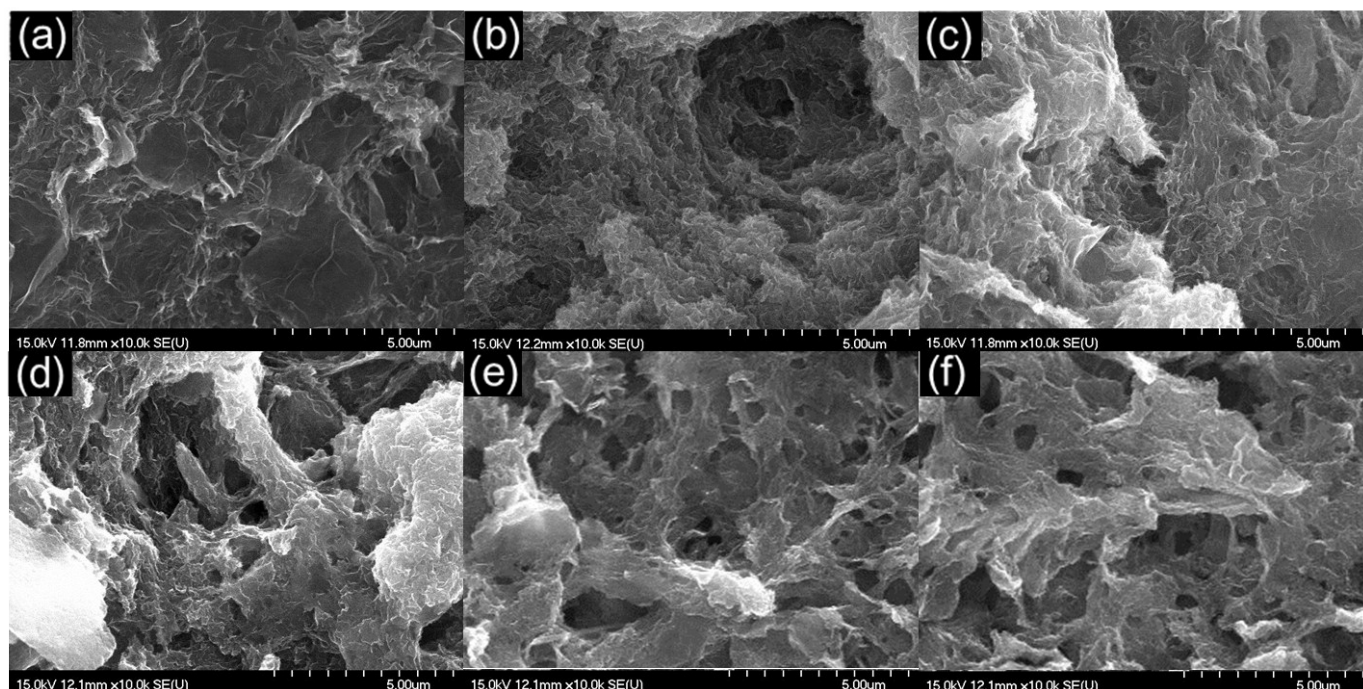

Figure S2. The SEM images of (a)rGO, (b)rGO-CNT<sub>0.5V</sub>, (c)rGO-CNT<sub>0.75V</sub>, (d) rGO-CNT<sub>1V</sub>, (e) rGO-CNT<sub>1.25V</sub>, (f) rGO-CNT<sub>1.5V</sub>

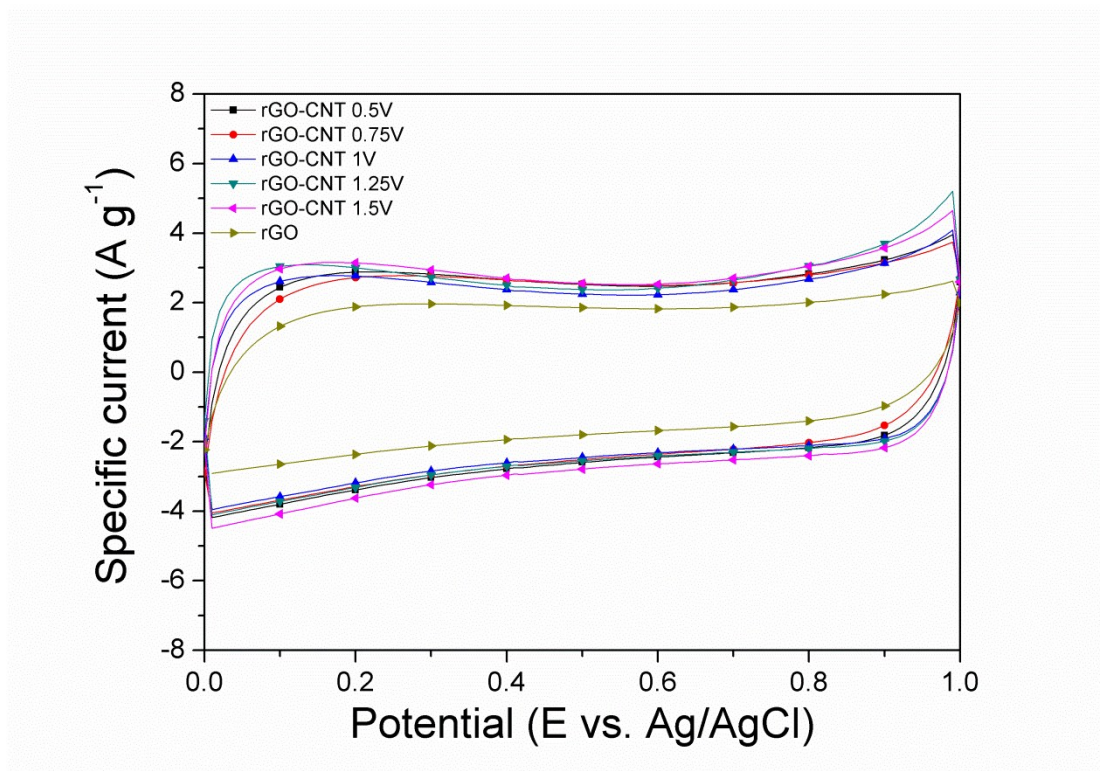

Figure S3. The CV curves of rGO, rGO-CNT<sub>0.5V</sub>, rGO-CNT<sub>0.75V</sub>, rGO-CNT<sub>1V</sub>, rGO-CNT<sub>1.25V</sub> and rGO-CNT<sub>1.5V</sub>

The specific capacitance of rGO, rGO-CNT<sub>0.5V</sub>, rGO-CNT<sub>0.75V</sub>, rGO-CNT<sub>1V</sub>, rGO-CNT<sub>1.25V</sub> and rGO-CNT<sub>1.5V</sub>, calculated from CV curves, was 75F g<sup>-1</sup>, 101F g<sup>-1</sup>, 110F g<sup>-1</sup>, 114F g<sup>-1</sup>, 119F g<sup>-1</sup> and 113F g<sup>-1</sup>, respectively.

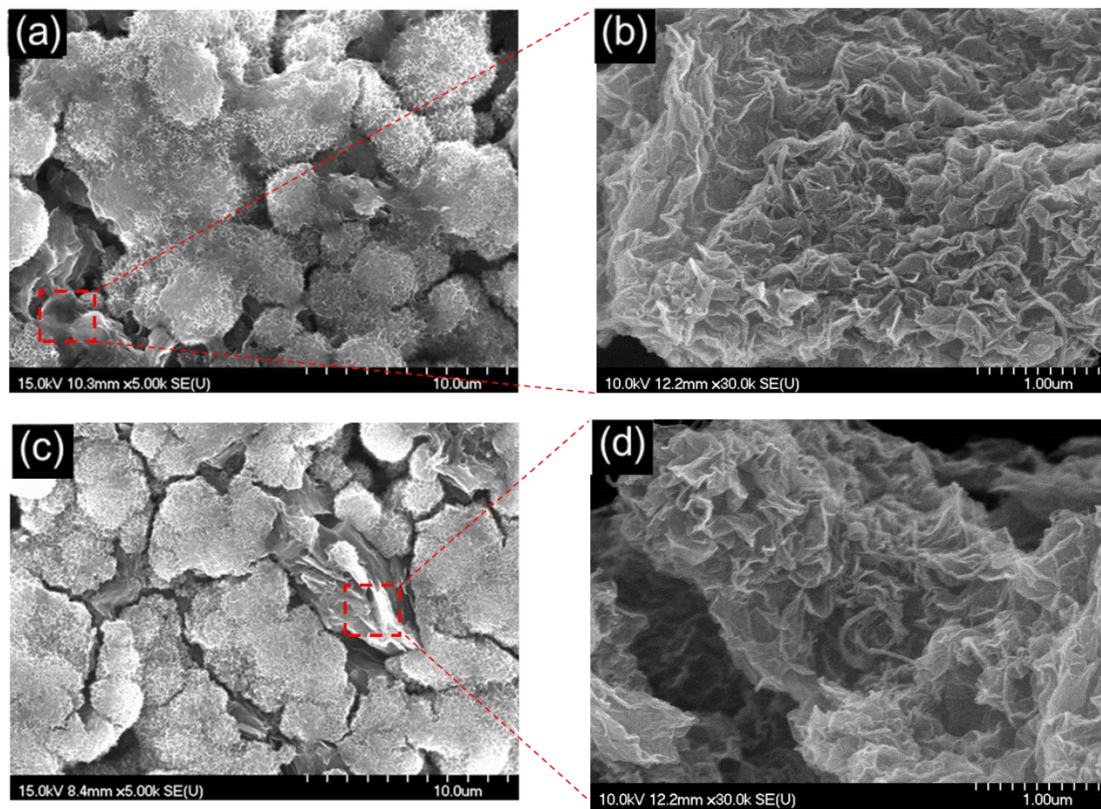

Figure S4. The CV curves of a-MnOx/CNT<sub>1.25V</sub>, a-MnOx/rGO<sub>1.25V</sub>, and a-MnOx/r-GO-CNT<sub>1.25V</sub>

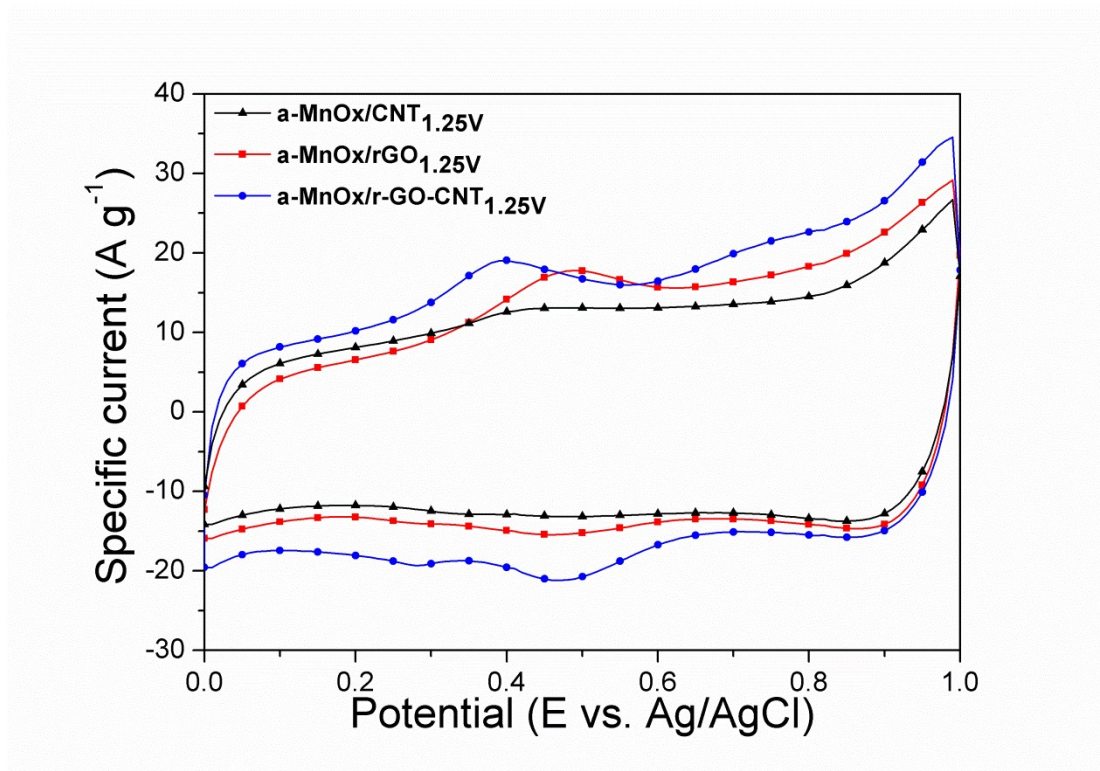

Figure S5. The SEM images of (a,c)  $\alpha$ -MnO<sub>x</sub>/rGO-CNT and (b,d) the exposed rGO-CNT

The specific capacitance of  $\alpha$ -MnO<sub>x</sub>/CNT<sub>1.25V</sub>,  $\alpha$ -MnO<sub>x</sub>/rGO<sub>1.25V</sub>, and  $\alpha$ -MnO<sub>x</sub>/r-GO-CNT<sub>1.25V</sub>, calculated from CV curves, was 311.7 F g<sup>-1</sup>, 349 F g<sup>-1</sup>, and 437 F g<sup>-1</sup>, respectively.
